# Supplementary material
Source: publisher site journal article supplement (https://www.spandidos-publications.com/2032/downloadSupplementary)

Figure S1. Verification of transfection efficacy of siRNA and OE vector. (A) Fluorescence microscope observation of H9C2 cells after transfection with NOX2 siRNA (magnification, x100). (B) Fluorescence microscope observation of H9C2 cells after transfection with NOX4 siRNA (magnification, x100). (C) RT-qPCR was performed to verify the knockdown of NOX2 using siRNA. (D) RT-qPCR was performed to verify the knockdown of NOX4 using siRNA. (E) Fluorescence microscope observation of H9C2 cells after transfection with NOX2 OE vector (magnification, x100). (F) Fluorescence microscope observation of H9C2 cells after transfection with NOX4 OE vector (magnification, x100). (G) RT-qPCR was performed to verify the upregulation of NOX2 following transfection with an OE vector. (H) RT-qPCR was performed to verify the upregulation of NOX4 following transfection with an OE vector. \* $P < 0.05$  vs. negative siRNA; † $P < 0.05$  vs. empty vector. siRNA, small interfering RNA; OE, overexpression; NOX, NAD(P)H oxidase; RT-qPCR, reverse transcription-quantitative PCR.

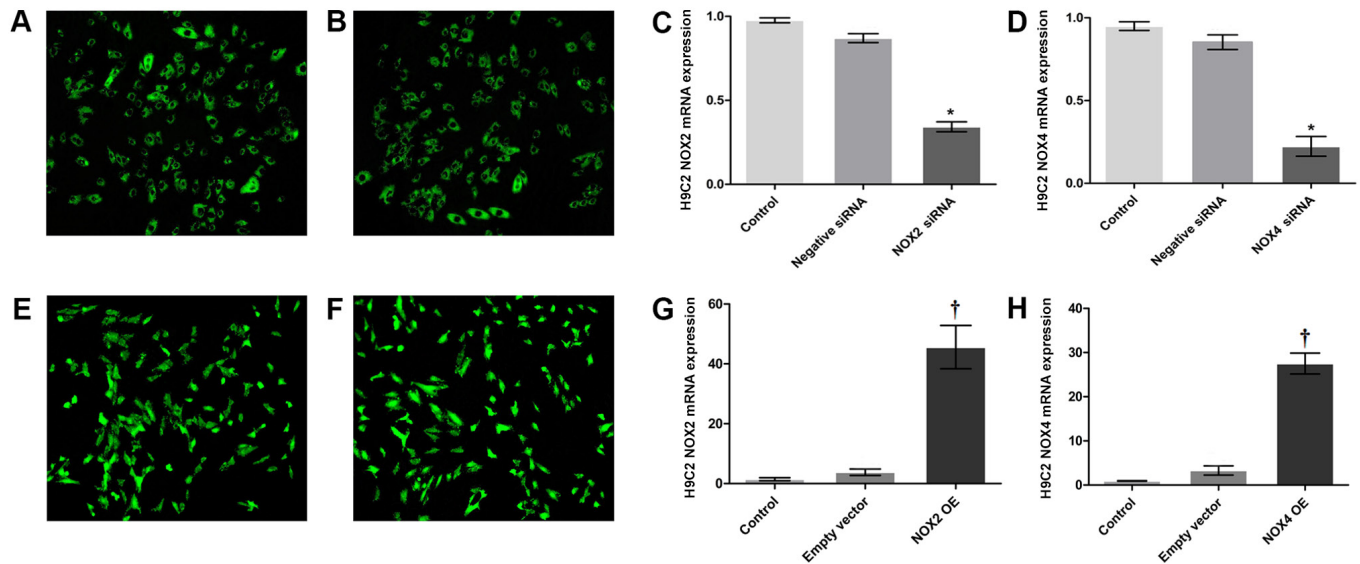

Supplement: Supplementary file 1 [file downloadSupplementary]
